# Supplementary material
Source: Springer Nature journal article supplement (https://www.springermedizin.de/resource/supplementary/12937_2011_429_MOESM1_ESM.pdf/25653088)
Supplement: MOESM1 [file 25653088]

4<sup>th</sup> grade, spring 2007

1477 invited

1045 (71%) participated

955 (65%) with complete weight/height

924 (63%) with complete weight/height and dietary data (Table 1)

7<sup>th</sup> grade, spring 2010

1503 invited

1095 (73%) participated

865 (58%) with complete weight/height

800 (53%) with complete dietary data (Table 1)

691 (46%) with complete weight/height and dietary data (Table 3)

427 with complete data at both time points (Tables 2 and 4)

386 who were normal weight at both times (345) or were overweight at both times (41) (Table 5)
